# Supplementary material for: Chemo- and optogenetic activation of hypothalamic Foxb1-expressing neurons and their terminal endings in the rostral-dorsolateral PAG leads to tachypnea, bradycardia, and immobility
Source: bioRxiv preprint, doi:10.1101/2023.01.10.521942, version 2 (2023-10-12)
Supplement: SuplementaryFile_S7 [file 521942_file09.pdf]

## Antibodies and fluorophores used for histological analysis

- Rabbit polyclonal to mCherry  
Abcam plc. (product code: ab167453)  
1:1000 in TBS 0.1M, incubation for 2 days
- Mouse monoclonal [2H2] to c-Fos  
Abcam plc. (product code: ab208942)  
1:2000 in TBS 0.1M, incubation for 2 days
- Chicken polyclonal to GFP  
Aves Labs, Inc. (product code: GFP-1020)  
1:200 in TBS 0.1M, incubation for 2 days
- Biotinylated Horse anti-Mouse IgG  
Vector Laboratories, Inc. (product code: BA-2000)  
1:200 in TBS 0.1M, incubation for 2 hours
- Alexa Fluor 647-conjugated Streptavidin  
Jackson ImmunoResearch (product code: 016-600-084)  
1:200 in Tris pH 8.2, incubation for 2 hours
- Cy2-conjugated AffiniPure Donkey anti-Chicken IgG  
Jackson ImmunoResearch (product code: 703-225-155)  
1:200 in Tris pH 8.2, incubation for 2 hours
- Cy3-conjugated AffiniPure Donkey anti-Rabbit IgG  
Jackson ImmunoResearch (product code: 711-165-152)  
1:200 in Tris pH 8.2, incubation for 2 hours
- DAPI  
Life Technologies Corporation (product code: D1306)  
1:5000 in TBS 0.1M, incubation for 5 minutes
